# Supplementary material for: Merging an organic TADF photosensitizer and a simple terpyridine–Fe(iii) complex for photocatalytic CO2 reduction
Source: Royal Society of Chemistry journal article supplement (doi:10.1039/d0cc05047d), 2020-01-01
Supplement: d0cc05047d1.pdf [file d0cc05047d1.pdf]

## Supporting Information

Merging an organic TADF photosensitizer and a simple terpyridine–Fe(III) complex for photocatalytic CO<sub>2</sub> reduction

Yanan Wang, Xue–Wang Gao, Junli Li and Duobin Chao\*

## 1. Experimental Section

### 1.1 Materials and instruments

All starting materials were purchased from commercial suppliers and used as received. Terpyridine **Totpy**<sup>1</sup> and 4CzIPN<sup>2</sup> were synthesized as reported. High-resolution mass spectra HR-ESI-MS spectra were recorded using a ThermoScientific Q Exactive instrument. Emission spectra were measured by Shimadzu RF-6000 as the light source. UV-vis absorption spectra were obtained on a G9 spectrophotometer. Cyclic voltammetry (CV) was carried out on CHI660E in a one-compartment cell equipped with a glassy carbon working electrode, a Ag/AgCl reference electrode, and a platinum wire counter electrode at a scan rate of 0.1 V s<sup>-1</sup> at room temperature. The potentials were referenced to SCE through an internal standard oxidation of ferrocene. GC analysis for CO<sub>2</sub> reduction was performed on Shimadzu GC-2014 (packed column TDX-01, 2 m x 3mm, FID detector and N<sub>2</sub> as carrier gas). GC-MS test was carried out with Agilent 7890B-5977A.

### 1.2 Synthesis of Fe(Totpy)Cl<sub>3</sub>

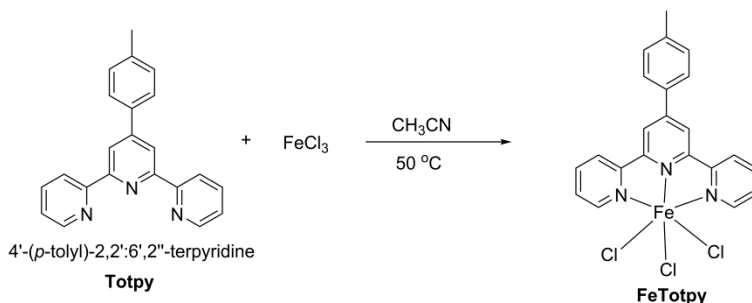

**Scheme S1** Synthetic route for catalyst **FeTotpy**.

The ligand **Totpy** (0.2 mmol, 65 mg) was added into 10 mL CH<sub>3</sub>CN solution containing FeCl<sub>3</sub>•6H<sub>2</sub>O (0.25 mmol, 68 mg) and stirred at 50 °C for 8 h. The precipitate was collected through filtration. Then the product was obtained as light green powder after drying in vacuum. Yield: 78 mg, 81%. HR-ESI-MS (m/z): found 449.0136 for [M-Cl]<sup>+</sup> (calcd. 449.0143 for C<sub>22</sub>H<sub>17</sub>Cl<sub>2</sub>FeN<sub>3</sub><sup>+</sup>). Elemental analysis: found C 54.72, H 3.26, N 8.39 (calcd. C 54.42, H 3.53, N 8.65).

### 1.3 Photocatalytic CO<sub>2</sub> reduction

General procedure: a 5 mL DMF or DMF/H<sub>2</sub>O solution containing **FeTotpy**, 4CzIPN or [Ru(bpy)<sub>3</sub>]<sup>2+</sup> and TEA was degassed with CO<sub>2</sub> for 18 min before irradiation at room temperature with a white LED light equipment (SMPC-LVWT, 420–650 nm, 3 W LEDs) supplied by Institute of Physics and Chemistry & Chinese Academy of Sciences. The generated CO and H<sub>2</sub>

were analyzed by injection of 200  $\mu\text{L}$  aliquots from reaction vial headspace into GC–2014 instrument equipped with TCD and FID detectors.

The quantum yield of the photocatalytic reaction is calculated according to the following equation:

$$\Phi = (\text{number of CO molecules}) \times 2 / (\text{number of incident photons}) \times 100\%$$

The moles of CO molecules was determined by GC–2014 and the number of incident photons was estimated by Newport Model 842–PE. The quantum yield estimated by this way seems to be relatively low because incident photons may not be fully used by the photosensitizer.

## References

1. J. Wang and G. S. Hanan, *Synlett*, 2005, **2005**, 1251–1254.
2. J. Luo and J. Zhang, *ACS Catal.*, 2016, **6**, 873–877.

## 2. Supplementary Figures

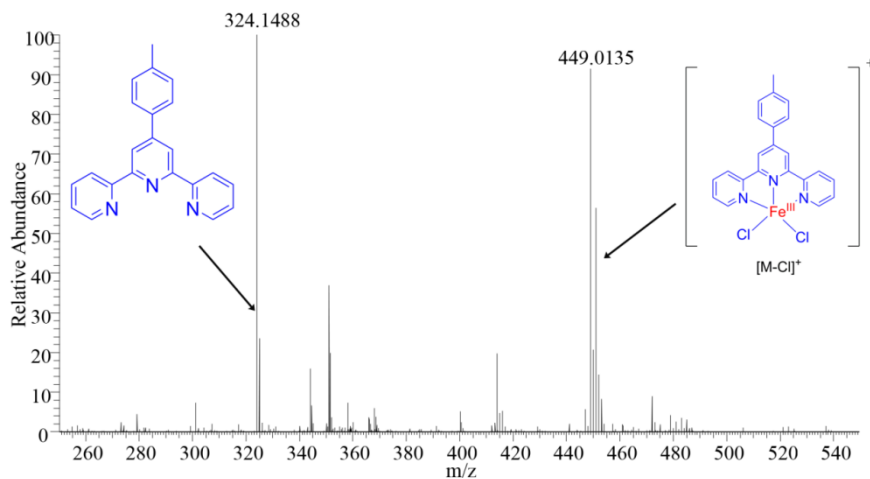

**Fig. S1** HR–ESI–MS spectrum of **FeTotpy**. The  $m/z$  signal at 449.0135 is due to release of one  $\text{Cl}^-$  from **FeTotpy**.

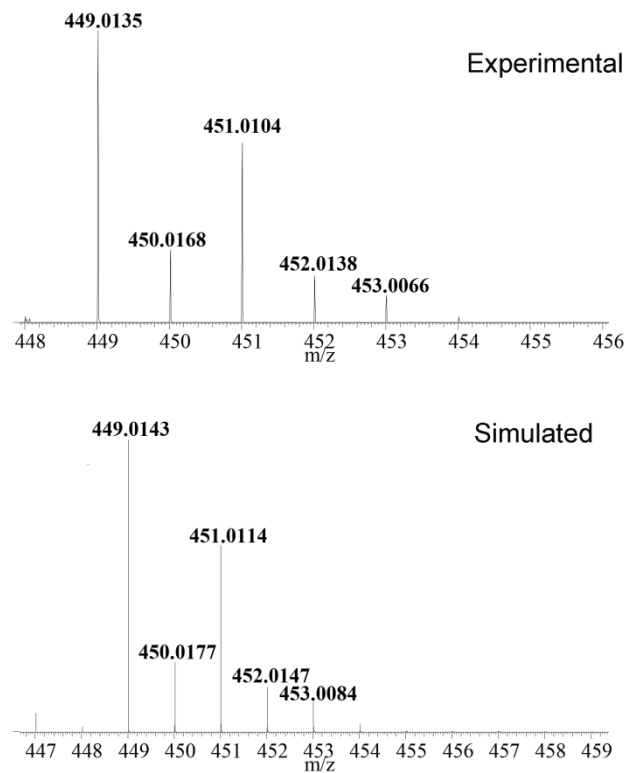

**Fig. S2** Comparison of experimental MS spectrum and simulated result of  $[M-Cl]^{+}$ .

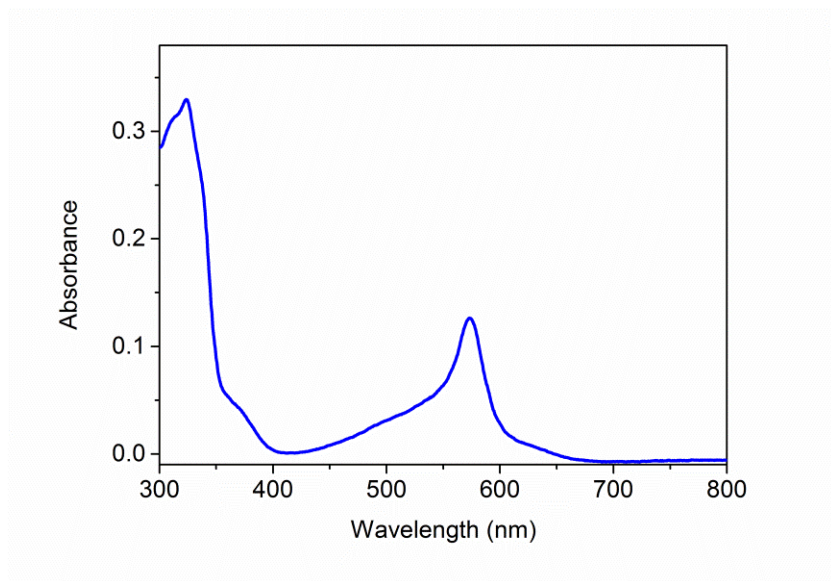

**Fig. S3** UV-vis absorption spectrum of **FeTotpy** (10  $\mu$ M) in DMF solution.

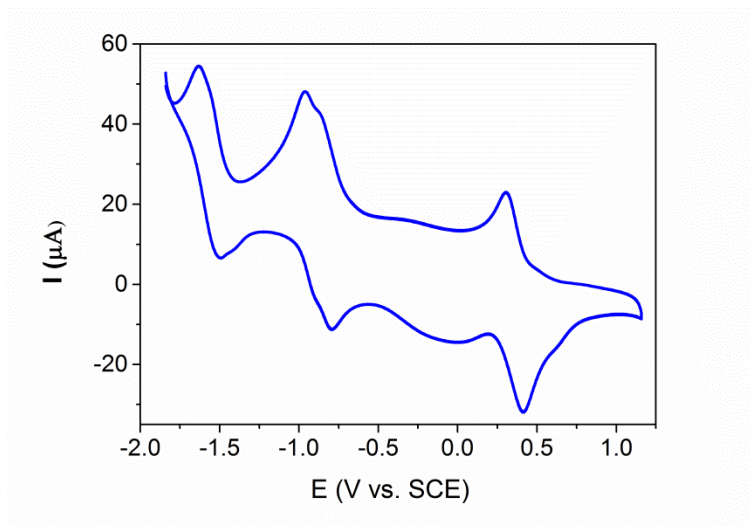

**Fig. S4** CV of complex **FeTotpy** in DMF at room temperature.

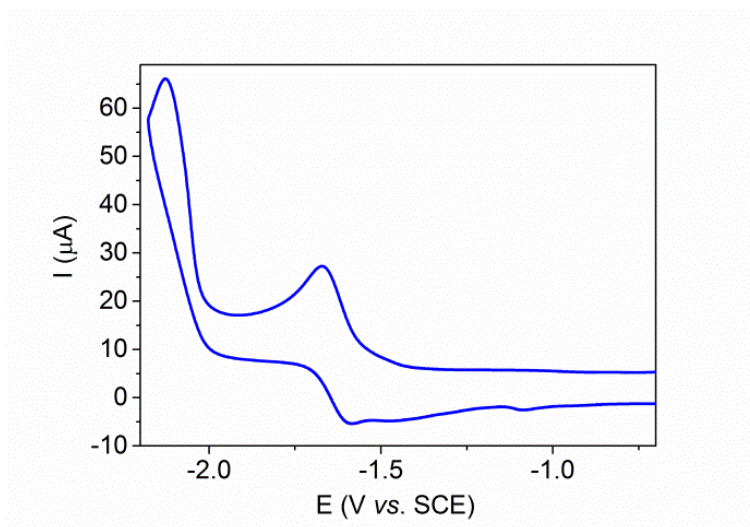

**Fig. S5** CV of ligand **Totpy** in DMF at room temperature.

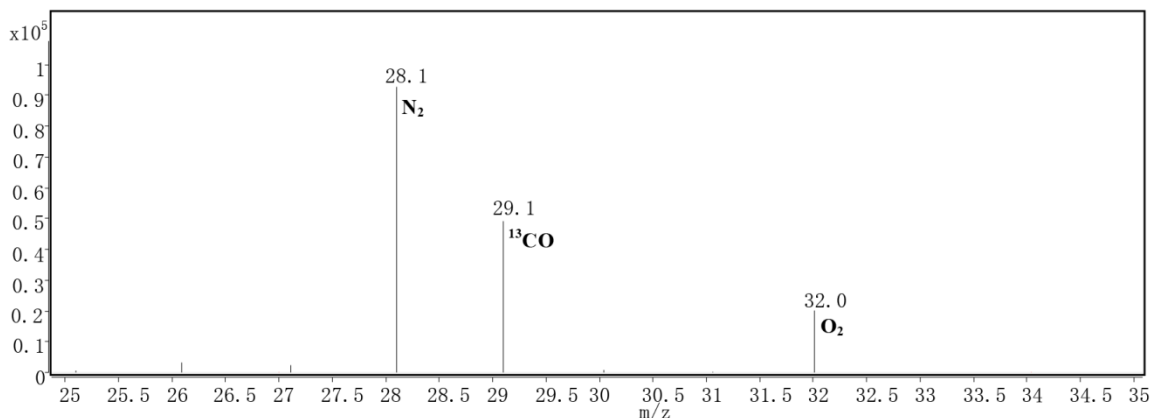

**Fig. S6** Isotopic labeling experiment with  $^{13}\text{CO}_2$  was conducted by injection 25 mL  $^{13}\text{CO}_2$  into pre-degassed reaction solution with  $\text{N}_2$ . The 200  $\mu\text{L}$  aliquots of headspace with a syringe were analyzed directly by GC-MS Agilent 7890B-5977A. Therefore, signals of  $\text{N}_2$  and  $\text{O}_2$  are observed.

**Table S1.** Photophysical properties and redox potentials of photosensitizers

| Dyes                           | Absorption /Emission<br>$\lambda_{\text{max}}(\text{nm})$ | $\tau$            | Excited State                                          |                                                       | Ground State                                         |                                                     | Ref.                                               |
|--------------------------------|-----------------------------------------------------------|-------------------|--------------------------------------------------------|-------------------------------------------------------|------------------------------------------------------|-----------------------------------------------------|----------------------------------------------------|
|                                |                                                           |                   | $E_{\text{Red}}(\text{P}^*/\text{P}^-)$<br>(V vs. SCE) | $E_{\text{Ox}}(\text{P}^+/\text{P}^*)$<br>(V vs. SCE) | $E_{\text{Red}}(\text{P}/\text{P}^-)$<br>(V vs. SCE) | $E_{\text{Ox}}(\text{P}^+/\text{P})$<br>(V vs. SCE) |                                                    |
| 4CzIPN                         | 435/550                                                   | 5.1 $\mu\text{s}$ | +1.35                                                  | -1.04                                                 | -1.21                                                | +1.52                                               | Angew. Chem. Int. Ed. 2014, 53, 6993–6996          |
| $\text{Ru}(\text{bpy})_3^{2+}$ | 452/620                                                   | 1.1 $\mu\text{s}$ | +0.77                                                  | -0.81                                                 | -1.33                                                | +1.29                                               | J. Org. Chem. 2012, 77, 1617–1622                  |
| Eosin Y                        | 520/553                                                   | 2.1 ns            | +0.83                                                  | -1.11                                                 | -1.06                                                | +0.78                                               | Chem. Commun., 2014, 50, 6688                      |
| FL                             | 437/545                                                   | 4.2 ns            | +0.77                                                  | -1.07                                                 | -1.17                                                | +0.87                                               | Photochemistry and Photobiology, 2010, 86, 492–498 |
| TEA                            |                                                           |                   |                                                        |                                                       |                                                      | +0.69                                               | C. R. Chimie, 2017, 20, 283–295                    |

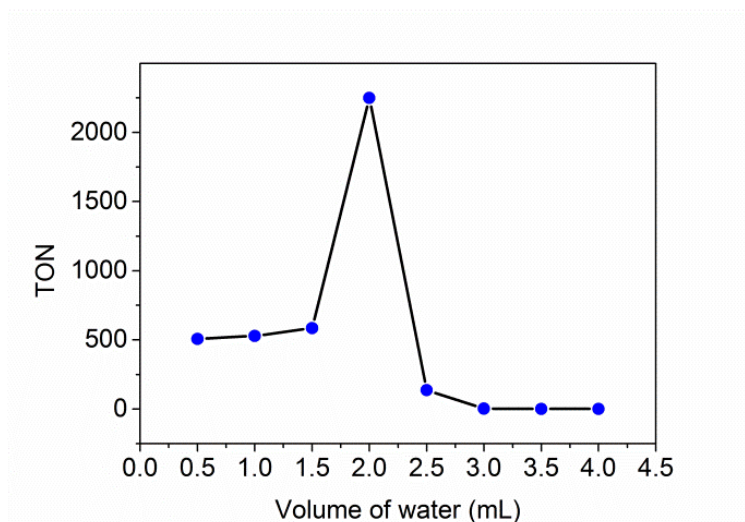

**Fig. S7** TONs of photocatalytic CO<sub>2</sub> reduction reaction using **FeTotpy**, 4CzIPN and TEA in mixed DMF/H<sub>2</sub>O solution (5 mL). The ratio of DMF/H<sub>2</sub>O is 9:1, 4:1, 7:3, 3:2, 1:1, 2:3, 3:7 and 1:4, respectively.

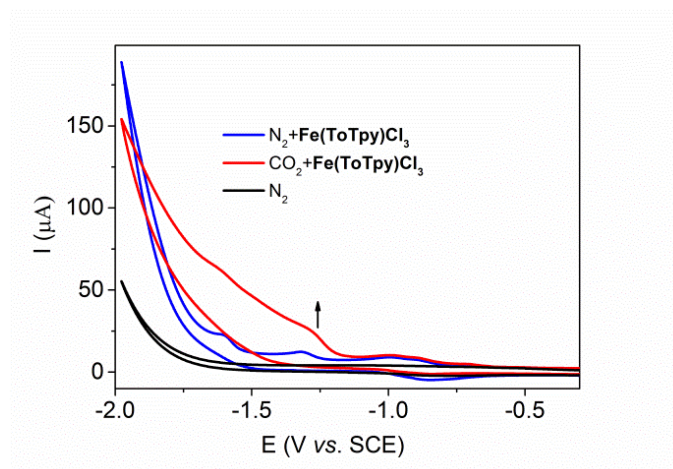

**Fig. S8** Cyclic voltammograms (CV) of **FeTotpy** (0.5 mM) in DMF/H<sub>2</sub>O (5:1) solution containing 0.1 M Bu<sub>4</sub>NPF<sub>6</sub> at 0.1 V s<sup>-1</sup> under N<sub>2</sub> (blue) and CO<sub>2</sub> (red) atmosphere at room temperature. The black line is the blank result of DMF/H<sub>2</sub>O (5:1) solution containing 0.1 M Bu<sub>4</sub>NPF<sub>6</sub> without **FeTotpy**.

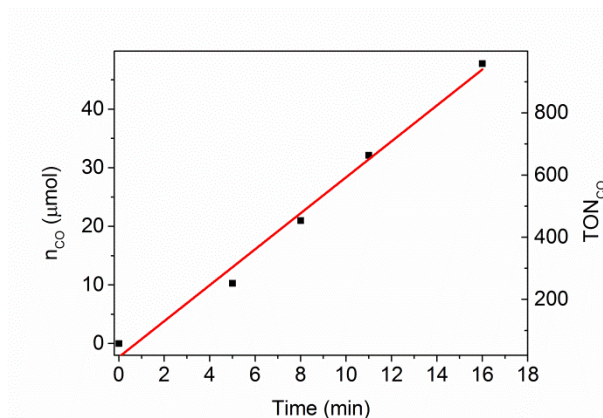

**Fig. S9** TOF determination for photocatalytic  $\text{CO}_2$  reduction with **FeTotpy**. Reaction conditions: **FeTotpy** ( $10 \mu\text{M}$ ), 4CzIPN ( $50 \mu\text{M}$ ) and TEA ( $0.28 \text{ M}$ ) in  $5 \text{ mL DMF/H}_2\text{O}$  ( $3:2$ ) solution.

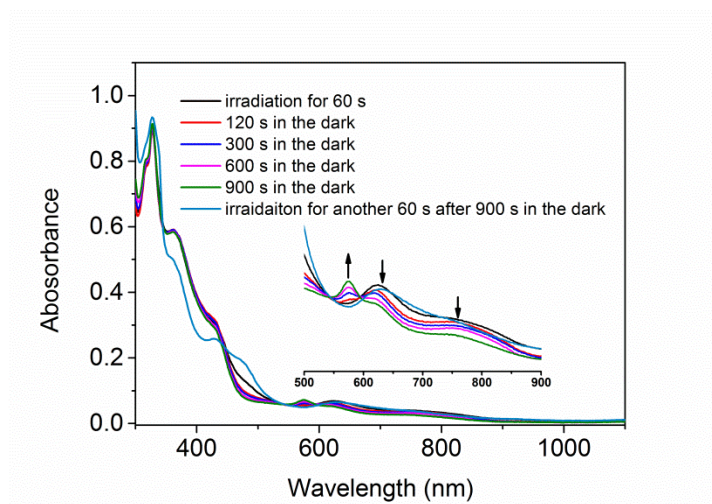

**Fig. S10** UV-vis absorption spectra of the solution containing **FeTotpy** ( $10 \mu\text{M}$ ), 4CzIPN ( $25 \mu\text{M}$ ) and TEA ( $0.1 \text{ M}$ ) in  $3 \text{ mL DMF}$  at room temperature under  $\text{N}_2$  atmosphere upon visible-light irradiation for  $60 \text{ s}$  and then in the dark for  $900 \text{ s}$ . The gray blue line shows the formed Fe(II) species through disproportionation of Fe(I) species could also be reduced by the photosensitizer 4CzIPN in the presence of TEA upon light irradiation for another  $60 \text{ s}$ . There is no complete overlap between yellow line and black line probably due to generation of Fe(0) species and minor decomposition.

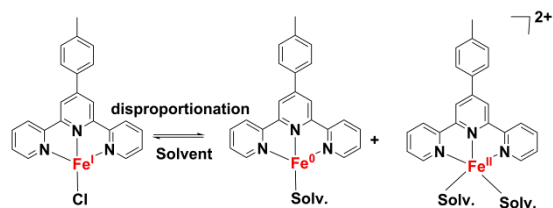

**Scheme 2** Disproportionation route of reduced Fe(I) species.



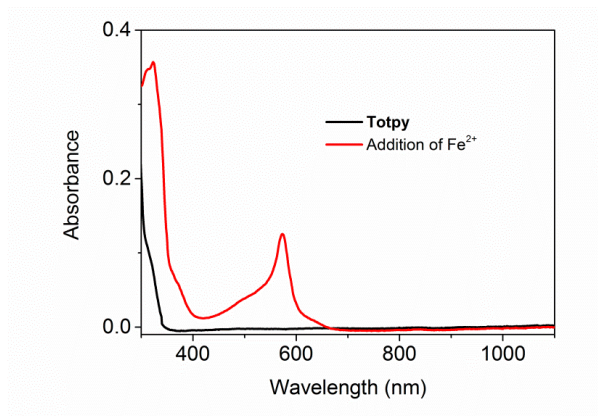

**Fig. S11** UV-vis absorption spectra of **Totpy** (10  $\mu\text{M}$ ) in DMF upon addition of excess  $\text{Fe}^{2+}$  (60  $\mu\text{M}$ ,  $\text{FeCl}_2 \cdot 4\text{H}_2\text{O}$ ) under  $\text{N}_2$  atmosphere. It should be noted that the spectrum is similar to that of **FeTotpy**.

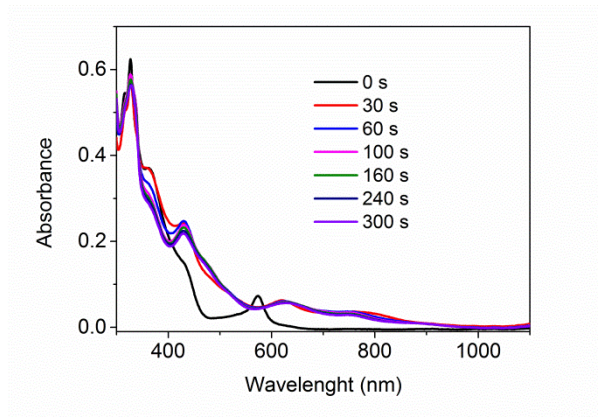

**Fig. S12** UV-vis absorption spectra of the solution containing **FeTotpy** (10  $\mu\text{M}$ ), 4CzIPN (25  $\mu\text{M}$ ) and TEA (0.1 M) in 3 mL DMF at room temperature under  $\text{CO}_2$  atmosphere upon visible-light irradiation for 0 s, 30 s, 60 s, 100s, 160s, 240 s and 300s, respectively.

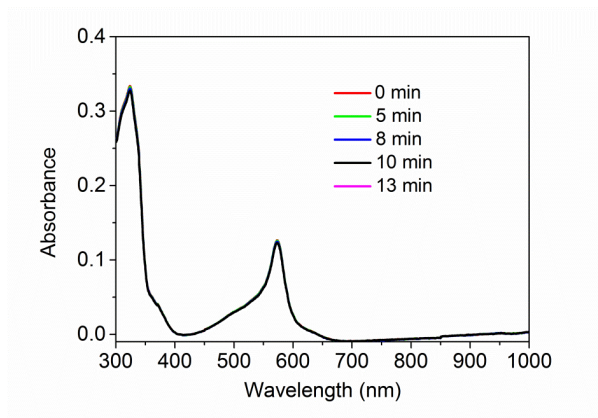

**Fig. S13** UV-vis absorption spectrum of **FeTotpy** (10  $\mu\text{M}$ ) in DMF solution upon visible-light irradiation.

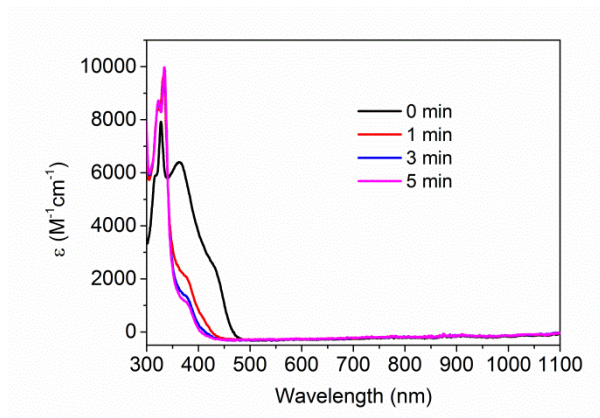

**Fig. S14** UV-vis absorption spectrum of 4CzIPN (25  $\mu\text{M}$ ) and TEA (0.1 M) in DMF solution upon visible-light irradiation.

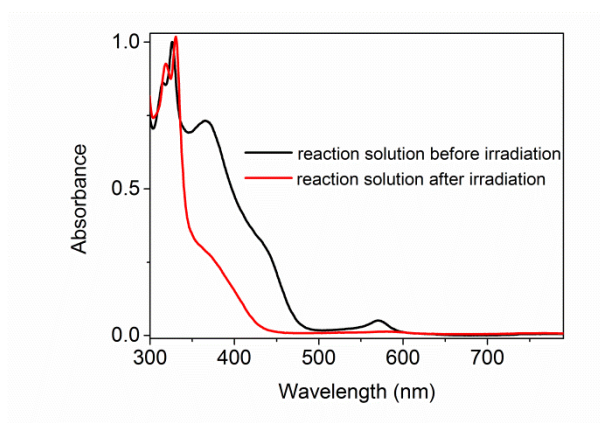

**Fig. S15** UV-vis absorption spectra of reaction solution before and after light irradiation for 180 min.

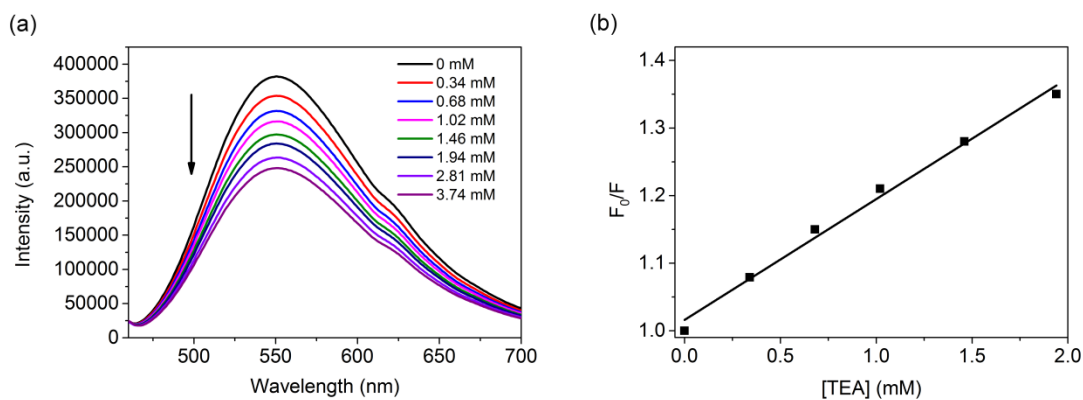

**Fig. S16** (a) Fluorescence titration experiments of 4CzIPN (10  $\mu\text{M}$ ) upon addition of TEA (0 – 3.74 mM) in DMF ( $\lambda_{\text{ex}} = 450 \text{ nm}$ ). (b) Corresponding plots ( $F_0/F$  vs concentrations of TEA). The Stern-Volmer constant and quenching rate constant are estimated to be  $6.1 \times 10^7 \text{ Lmol}^{-1}$  and  $1.2 \times 10^7 \text{ Lmol}^{-1}\text{s}^{-1}$ .

Stern–Volmer equation

$$F_0/F_n = 1 + K_D[Q] = 1 + k_q\tau_0[Q]$$

where  $F_0$  and  $F_n$  are the emission intensity in the absence and presence of quenching agent TEA,  $\tau_0$  is the emission lifetime of 4CzIPN in the absence TEA,  $k_q$  is the bimolecular quenching rate constant,  $K_D$  is the Stern–Volmer quenching constant, and  $[Q]$  is the molar concentration of TEA.
